# Supplementary material for: In Silico Epitope-Based Vaccine Prediction against Fungal Infection Aspergillosis
Source: MDPI journal article supplement (doi:10.3390/challe13020029), 2022-07-06
Supplement: s1 [file s1]

Archive with 1 entries (1 files):
- challenges-1742399-supplementary.pdf
